# Supplementary material for: Leguminous Seedborne Pathogens: Seed Health and Sustainable Crop Management
Source: MDPI journal article supplement (doi:10.3390/plants12102040), 2023-05-19
Supplement: s1 [file s1]

**Supplementary Table S1.** Categorization of seedborne pathogens of legumes in global territories.

| Pathogen                                          | Country        | Categorization  | Year of addition |
|---------------------------------------------------|----------------|-----------------|------------------|
| <i>Colletotrichum lindemuthianum</i>              | Egypt          | RNQP            | 2018             |
| <i>Aphanomyces euteiches</i>                      | Mexico         | Quarantine pest | 2018             |
| <i>Ascochyta fabae</i>                            | Egypt          | A1 list         | 2018             |
| <i>Ascochyta phaseolorum</i>                      | Mexico         | Quarantine pest | 2018             |
| <i>Ascochyta pinodes</i>                          | Mexico         | Quarantine pest | 2018             |
| <i>Ascochyta pinodella</i>                        | China          | Quarantine pest | 2021             |
| <i>Ascochyta rabiei</i>                           | Brasil         | A1 list         | 2018             |
| <i>Ascochyta rabiei</i>                           | Chile          | A1 list         | 2019             |
| <i>Ascochyta rabiei</i>                           | Mexico         | Quarantine pest | 2018             |
| <i>Botrytis cinerea</i>                           | Switzerland    | RNQP            | 2019             |
| <i>Botrytis cinerea</i>                           | United Kingdom | RNQP            | 2020             |
| <i>Botrytis cinerea</i>                           | EU             | RNQP (Annex IV) | 2019             |
| <i>Botrytis fabae</i>                             | Brasil         | A1 list         | 2018             |
| <i>Diaporthe longicolla</i>                       | Mexico         | Quarantine pest | 2018             |
| <i>Diaporthe phaseolorum</i>                      | Israel         | Quarantine pest | 2009             |
| <i>Diaporthe phaseolorum</i>                      | Uzbekistan     | A1 list         | 2008             |
| <i>Phoma exigua</i>                               | Mexico         | Quarantine pest | 2018             |
| <i>Rhizoctonia solani</i>                         | Mexico         | Quarantine pest | 2018             |
| <i>Rhizoctonia solani</i>                         | Switzerland    | RNQP            | 2019             |
| <i>Rhizoctonia solani</i>                         | United Kingdom | RNQP            | 2020             |
| <i>Rhizoctonia solani</i>                         | EU             | RNQP (Annex IV) | 2019             |
| <i>Sclerotinia sclerotiorum</i>                   | Egypt          | RNQP            | 2018             |
| <i>Sclerotinia sclerotiorum</i>                   | Switzerland    | RNQP            | 2019             |
| <i>Sclerotinia sclerotiorum</i>                   | United Kingdom | RNQP            | 2020             |
| <i>Sclerotinia sclerotiorum</i>                   | EU             | RNQP (Annex IV) | 2019             |
| <i>Xanthomonas axonopodis</i> pv. <i>phaseoli</i> | Egypt          | A1 list         | 2018             |
| <i>Xanthomonas axonopodis</i> pv. <i>phaseoli</i> | Morocco        | Quarantine pest | 2018             |

| Pathogen                                          | Country        | Categorization  | Year of addition |
|---------------------------------------------------|----------------|-----------------|------------------|
| <i>Xanthomonas axonopodis</i> pv. <i>phaseoli</i> | Tunisia        | Quarantine pest | 2012             |
| <i>Xanthomonas axonopodis</i> pv. <i>phaseoli</i> | Bahrain        | A2 list         | 2003             |
| <i>Xanthomonas axonopodis</i> pv. <i>phaseoli</i> | Israel         | Quarantine pest | 2009             |
| <i>Xanthomonas axonopodis</i> pv. <i>phaseoli</i> | Jordan         | A2 list         | 2013             |
| <i>Xanthomonas axonopodis</i> pv. <i>phaseoli</i> | Azerbaijan     | A1 list         | 2007             |
| <i>Xanthomonas axonopodis</i> pv. <i>phaseoli</i> | Switzerland    | RNQP            | 2019             |
| <i>Xanthomonas axonopodis</i> pv. <i>phaseoli</i> | Türkiye        | A2 list         | 2016             |
| <i>Xanthomonas axonopodis</i> pv. <i>phaseoli</i> | United Kingdom | RNQP            | 2020             |
| <i>Xanthomonas axonopodis</i> pv. <i>phaseoli</i> | EPPO           | A2 list         | 1975             |
| <i>Xanthomonas citri</i> pv. <i>fuscans</i>       | EU             | RNQP (Annex IV) | 2019             |
| <i>Xanthomonas citri</i> pv. <i>fuscans</i>       | Switzerland    | RNQP            | 2019             |
| <i>Xanthomonas citri</i> pv. <i>fuscans</i>       | United Kingdom | RNQP            | 2020             |
| <i>Xanthomonas citri</i> pv. <i>fuscans</i>       | EPPO           | A2 list         | 2021             |
| <i>Xanthomonas citri</i> pv. <i>fuscans</i>       | EU             | RNQP            | 2019             |
| <i>Xanthomonas citri</i> pv. <i>vignicola</i>     | Egypt          | RNQP            | 2018             |
| <i>Xanthomonas citri</i> pv. <i>vignicola</i>     | Mexico         | Quarantine pest | 2018             |
| <i>Xanthomonas citri</i> pv. <i>vignicola</i>     | Jordan         | A2 list         | 2013             |
| <i>Xanthomonas citri</i> pv. <i>vignicola</i>     | Switzerland    | RNQP            | 2019             |

| Pathogen                                                         | Country        | Categorization  | Year of<br>addition |
|------------------------------------------------------------------|----------------|-----------------|---------------------|
| <i>Xanthomonas citri</i><br>pv. <i>vignicola</i>                 | United Kingdom | RNQP            | 2020                |
| <i>Xanthomonas citri</i><br>pv. <i>vignicola</i>                 | EU             | RNQP            | 2019                |
| <i>Pseudomonas</i><br><i>syringae</i> pv. <i>glycinea</i>        | Mexico         | Quarantine pest | 2018                |
| <i>Pseudomonas</i><br><i>syringae</i> pv.<br><i>phaseolicola</i> | Paraguay       | A1 list         | 1995                |
| <i>Pseudomonas</i><br><i>syringae</i> pv.<br><i>phaseolicola</i> | Uruguay        | A1 list         | 1995                |
| <i>Pseudomonas</i><br><i>syringae</i> pv.<br><i>phaseolicola</i> | Bahrain        | A1 list         | 2003                |
| <i>Pseudomonas</i><br><i>syringae</i> pv.<br><i>phaseolicola</i> | China          | Quarantine pest | 2021                |
| <i>Pseudomonas</i><br><i>syringae</i> pv.<br><i>phaseolicola</i> | Israel         | Quarantine pest | 2009                |
| <i>Pseudomonas</i><br><i>syringae</i> pv.<br><i>phaseolicola</i> | Jordan         | A2 list         | 2013                |
| <i>Pseudomonas</i><br><i>syringae</i> pv. <i>pisi</i>            | Egypt          | A1 list         | 2018                |
| <i>Pseudomonas</i><br><i>syringae</i> pv. <i>pisi</i>            | Tunisia        | Quarantine pest | 2012                |
| <i>Pseudomonas</i><br><i>syringae</i> pv. <i>pisi</i>            | Chile          | A1 list         | 2019                |
| <i>Pseudomonas</i><br><i>syringae</i> pv. <i>pisi</i>            | Paraguay       | A1 list         | 1995                |
| <i>Pseudomonas</i><br><i>syringae</i> pv. <i>pisi</i>            | China          | Quarantine pest | 2021                |
| <i>Pseudomonas</i><br><i>syringae</i> pv. <i>pisi</i>            | Israel         | Quarantine pest | 2009                |
| <i>Pseudomonas</i><br><i>syringae</i> pv. <i>pisi</i>            | Jordan         | A2 list         | 2013                |
| <i>Pseudomonas</i><br><i>syringae</i> pv. <i>pisi</i>            | Türkiye        | A1 list         | 2016                |
| <i>Pseudomonas</i><br><i>syringae</i> pv. <i>syringae</i>        | Egypt          | RNQP            | 2018                |
| <i>Pseudomonas</i><br><i>syringae</i> pv. <i>syringae</i>        | Mexico         | Quarantine pest | 2018                |
| <i>Pseudomonas</i><br><i>syringae</i> pv. <i>syringae</i>        | Jordan         | A2 list         | 2013                |

| Pathogen                                                       | Country        | Categorization  | Year of<br>addiction |
|----------------------------------------------------------------|----------------|-----------------|----------------------|
| <i>Pseudomonas syringae</i> pv. <i>syringae</i>                | Switzerland    | RNQP            | 2019                 |
| <i>Pseudomonas syringae</i> pv. <i>syringae</i>                | United Kingdom | RNQP            | 2020                 |
| <i>Pseudomonas syringae</i> pv. <i>syringae</i>                | EU             | RNQP            | 2019                 |
| <i>Pseudomonas viridiflava</i>                                 | Mexico         | Quarantine pest | 2018                 |
| <i>Pseudomonas viridiflava</i>                                 | Switzerland    | RNQP            | 2019                 |
| <i>Pseudomonas viridiflava</i>                                 | United Kingdom | RNQP            | 2020                 |
| <i>Pseudomonas viridiflava</i>                                 | EU             | RNQP            | 2019                 |
| <i>Curtobacterium flaccumfaciens</i> pv. <i>flaccumfaciens</i> | Egypt          | A1 list         | 2018                 |
| <i>Curtobacterium flaccumfaciens</i> pv. <i>flaccumfaciens</i> | Morocco        | Quarantine pest | 2018                 |
| <i>Curtobacterium flaccumfaciens</i> pv. <i>flaccumfaciens</i> | Tunisia        | Quarantine pest | 2012                 |
| <i>Curtobacterium flaccumfaciens</i> pv. <i>flaccumfaciens</i> | Argentina      | A1 list         | 2019                 |
| <i>Curtobacterium flaccumfaciens</i> pv. <i>flaccumfaciens</i> | Chile          | A1 list         | 2019                 |
| <i>Curtobacterium flaccumfaciens</i> pv. <i>flaccumfaciens</i> | Paraguay       | A1 list         | 1993                 |
| <i>Curtobacterium flaccumfaciens</i> pv. <i>flaccumfaciens</i> | Bahrain        | A1 list         | 2003                 |
| <i>Curtobacterium flaccumfaciens</i> pv. <i>flaccumfaciens</i> | China          | Quarantine pest | 2021                 |
| <i>Curtobacterium flaccumfaciens</i> pv. <i>flaccumfaciens</i> | Israel         | Quarantine pest | 2009                 |
| <i>Curtobacterium flaccumfaciens</i> pv. <i>flaccumfaciens</i> | Jordan         | A1 list         | 2013                 |

| Pathogen                                                       | Country        | Categorization     | Year of addition |
|----------------------------------------------------------------|----------------|--------------------|------------------|
| <i>Curtobacterium flaccumfaciens</i> pv. <i>flaccumfaciens</i> | Georgia        | A1 list            | 2018             |
| <i>Curtobacterium flaccumfaciens</i> pv. <i>flaccumfaciens</i> | Switzerland    | A1 list            | 2019             |
| <i>Curtobacterium flaccumfaciens</i> pv. <i>flaccumfaciens</i> | Türkiye        | A1 list            | 2016             |
| <i>Curtobacterium flaccumfaciens</i> pv. <i>flaccumfaciens</i> | United Kingdom | A1 list            | 2020             |
| <i>Curtobacterium flaccumfaciens</i> pv. <i>flaccumfaciens</i> | APPPC          | A1 list            | 1993             |
| <i>Curtobacterium flaccumfaciens</i> pv. <i>flaccumfaciens</i> | COSAVE         | A2 list            | 2018             |
| <i>Curtobacterium flaccumfaciens</i> pv. <i>flaccumfaciens</i> | EPPO           | A2 list            | 1975             |
| <i>Curtobacterium flaccumfaciens</i> pv. <i>flaccumfaciens</i> | EU             | A1 Quarantine pest | 2019             |
| <i>Curtobacterium flaccumfaciens</i> pv. <i>flaccumfaciens</i> | IAPSC          | A1 list            | 1989             |
| Alfalfa mosaic virus                                           | Egypt          | RNQP               | 2018             |
| Alfalfa mosaic virus                                           | Bahrain        | A2 list            | 2003             |
| Alfalfa mosaic virus                                           | Jordan         | A2 list            | 2013             |
| Bean yellow mosaic virus                                       | Egypt          | RNQP               | 2018             |
| Bean yellow mosaic virus                                       | Bahrain        | A2 list            | 2003             |
| Bean yellow mosaic virus                                       | Jordan         | A2 list            | 2013             |
| Cucumber mosaic virus                                          | Egypt          | RNQP               | 2018             |
| Cucumber mosaic virus                                          | Bahrain        | A2 list            | 2003             |
| Cucumber mosaic virus                                          | Jordan         | A2 list            | 2013             |
| Cucumber mosaic virus                                          | Switzerland    | RNQP               | 2019             |
| Cucumber mosaic virus                                          | United Kingdom | RNQP               | 2020             |

| Pathogen                           | Country                     | Categorization  | Year of<br>addiction |
|------------------------------------|-----------------------------|-----------------|----------------------|
| Cucumber mosaic<br>virus           | EU                          | RNQP            | 2019                 |
| Cucumber mosaic<br>virus           | IAPSC                       | A2 list         | 1992                 |
| Pea seed-borne<br>mosaic virus     | Egypt                       | A2 list         | 2018                 |
| Pea seed-borne<br>mosaic virus     | Argentina                   | A1 list         | 2019                 |
| Pea seed-borne<br>mosaic virus     | Mexico                      | Quarantine pest | 2018                 |
| Pea seed-borne<br>mosaic virus     | Bahrain                     | A1 list         | 2003                 |
| Pea seed-borne<br>mosaic virus     | Jordan                      | A2 list         | 2013                 |
| Bean common<br>mosaic virus        | Egypt                       | A2 list         | 2018                 |
| Bean common<br>mosaic virus        | Morocco                     | Quarantine pest | 2018                 |
| Bean common<br>mosaic virus        | Argentina                   | A1 list         | 2019                 |
| Bean common<br>mosaic virus        | United States of<br>America | Quarantine pest | 2000                 |
| Bean common<br>mosaic virus        | Bahrain                     | A1 list         | 2003                 |
| Bean common<br>mosaic virus        | Jordan                      | A2 list         | 2013                 |
| Soybean mosaic<br>virus            | Egypt                       | A2 list         | 2018                 |
| Lucerne australian<br>latent virus | United States of<br>America | Quarantine pest | 2000                 |
| Lucerne australian<br>latent virus | Jordan                      | A1 list         | 2013                 |
| Clover yellow vein<br>virus        | Brasil                      | A1 list         | 2018                 |
| Tobacco ringspot<br>virus          | Egypt                       | A2 list         | 2018                 |
| Tobacco ringspot<br>virus          | Morocco                     | Quarantine pest | 2018                 |
| Tobacco ringspot<br>virus          | Tunisia                     | Quarantine pest | 2012                 |
| Tobacco ringspot<br>virus          | Argentina                   | A1 list         | 2019                 |
| Tobacco ringspot<br>virus          | Brazil                      | A1 list         | 2018                 |
| Tobacco ringspot<br>virus          | Canada                      | Quarantine pest | 2019                 |

| Pathogen                   | Country        | Categorization     | Year of<br>addition |
|----------------------------|----------------|--------------------|---------------------|
| Tobacco ringspot virus     | Mexico         | Quarantine pest    | 2018                |
| Tobacco ringspot virus     | Paraguay       | A1 list            | 1995                |
| Tobacco ringspot virus     | China          | Quarantine pest    | 2021                |
| Tobacco ringspot virus     | Israel         | Quarantine pest    | 2009                |
| Tobacco ringspot virus     | Jordan         | A2 list            | 2013                |
| Tobacco ringspot virus     | Kazakhstan     | A1 list            | 2017                |
| Tobacco ringspot virus     | Moldova        | Quarantine pest    | 2017                |
| Tobacco ringspot virus     | Norway         | Quarantine pest    | 2012                |
| Tobacco ringspot virus     | Russia         | A2 list            | 2014                |
| Tobacco ringspot virus     | Switzerland    | A1 list            | 2019                |
| Tobacco ringspot virus     | Türkiye        | A1 list            | 2016                |
| Tobacco ringspot virus     | Ukraine        | A1 list            | 2019                |
| Tobacco ringspot virus     | United Kingdom | A1 list            | 2020                |
| Tobacco ringspot virus     | EPPO           | A2 list            | 1995                |
| Tobacco ringspot virus     | EU             | A1 Quarantine pest | 2019                |
| Southern bean mosaic virus | Argentina      | A1 list            | 2019                |
| Southern bean mosaic virus | Paraguay       | A1 list            | 1995                |
| Southern bean mosaic virus | China          | Quarantine pest    | 2021                |
| Southern bean mosaic virus | Jordan         | A1 list            | 2013                |
| Tomato mottle mosaic virus | EPPO           | Alert list         | 2020                |
| Broad bean stain virus     | Egypt          | RNQP               | 2018                |
| Broad bean stain virus     | China          | Quarantine pest    | 2021                |
| Broad bean stain virus     | Jordan         | A2 list            | 2013                |

| Pathogen                     | Country                     | Categorization  | Year of<br>addiction |
|------------------------------|-----------------------------|-----------------|----------------------|
| Indian peanut<br>clump virus | United States of<br>America | Quarantine pest | 2000                 |
| Peanut clump virus           | United States of<br>America | Quarantine pest | 2000                 |
| Peanut clump virus           | Bahrain                     | A1 list         | 2003                 |
| Tobacco streak<br>virus      | Mexico                      | Quarantine pest | 2018                 |
| Tobacco streak<br>virus      | Paraguay                    | A1 list         | 1995                 |
| Tobacco streak<br>virus      | Israel                      | Quarantine pest | 2009                 |
| Tobacco streak<br>virus      | Jordan                      | A1 list         | 2013                 |
| Tobacco streak<br>virus      | Türkiye                     | A1 list         | 2016                 |
| Bean pod mottle<br>virus     | Argentina                   | A1 list         | 2019                 |
| Bean pod mottle<br>virus     | Bahrain                     | A1 list         | 2003                 |
| Bean pod mottle<br>virus     | China                       | Quarantine pest | 2021                 |

Data retrieved from EPPO Global Database accessed on April, 28<sup>th</sup> 2023.
